# Supplementary material
Source: PubMed Central journal article supplement (PMC2879067)
Supplement: NIHMS193266-supplement-01.pdf [file NIHMS193266-supplement-01.pdf]

Supplemental Online Material

Table 3 online supplemental material. Correlation coefficients R, F test statistics and regression coefficients  $h_{HbO}$  ( $10^{-7}$ ) of P1, N1, and P2 to predict HbR for each anesthetic and for combined anesthetics.

| HbO vs.                                   | R    |      |      | F   |     |      | $h_{HbO}$ |      |      |             |
|-------------------------------------------|------|------|------|-----|-----|------|-----------|------|------|-------------|
|                                           | P1   | N1   | P2   | P1  | N1  | P2   | P1        | N1   | P2   | (P2,N2)     |
| Alpha-Chloralose                          | 0.99 | 1    | 0.99 | 209 | 625 | 470  | 0.73      | 0.29 | 0.37 |             |
| Pentobarbital                             | 0.98 | 0.97 | 0.9  | 152 | 70  | 20   | 0.31      | 0.22 | 0.47 |             |
| Ketamine-Xylazine                         | 0.92 | 0.92 | 0.91 | 28  | 26  | 24   | 1.12      | 0.08 | 0.06 | (.14,-0.19) |
| Fentanyl                                  | 0.93 | 0.91 | 0.92 | 32  | 23  | 27   | 1.78      | 0.16 | 0.08 | (.29,-0.34) |
| Isoflurane                                | 0.98 | 0.99 | 0.99 | 118 | 251 | 258  | 1.75      | 0.39 | 0.45 |             |
| Propofol                                  | 0.88 | 0.86 | 0.89 | 16  | 14  | 20   | 0.26      | 0.21 | 0.43 |             |
| Regression all Anesthetics Combined       | 0.64 | 0.57 | 0.33 | 28  | 19  | 5    | 0.7       | 0.16 | 0.11 | (.35,-0.54) |
| Regression GABAergic Anesthetics Combined | 0.65 | 0.96 | 0.99 | 19  | 296 | 1098 | 0.66      | 0.31 | 0.41 |             |

We do not report results for N2 in this table because N2 is 0 for four of the six anesthetics. Last column report P2 and N2 regression coefficients when both P2 and N2 are used as regressors.

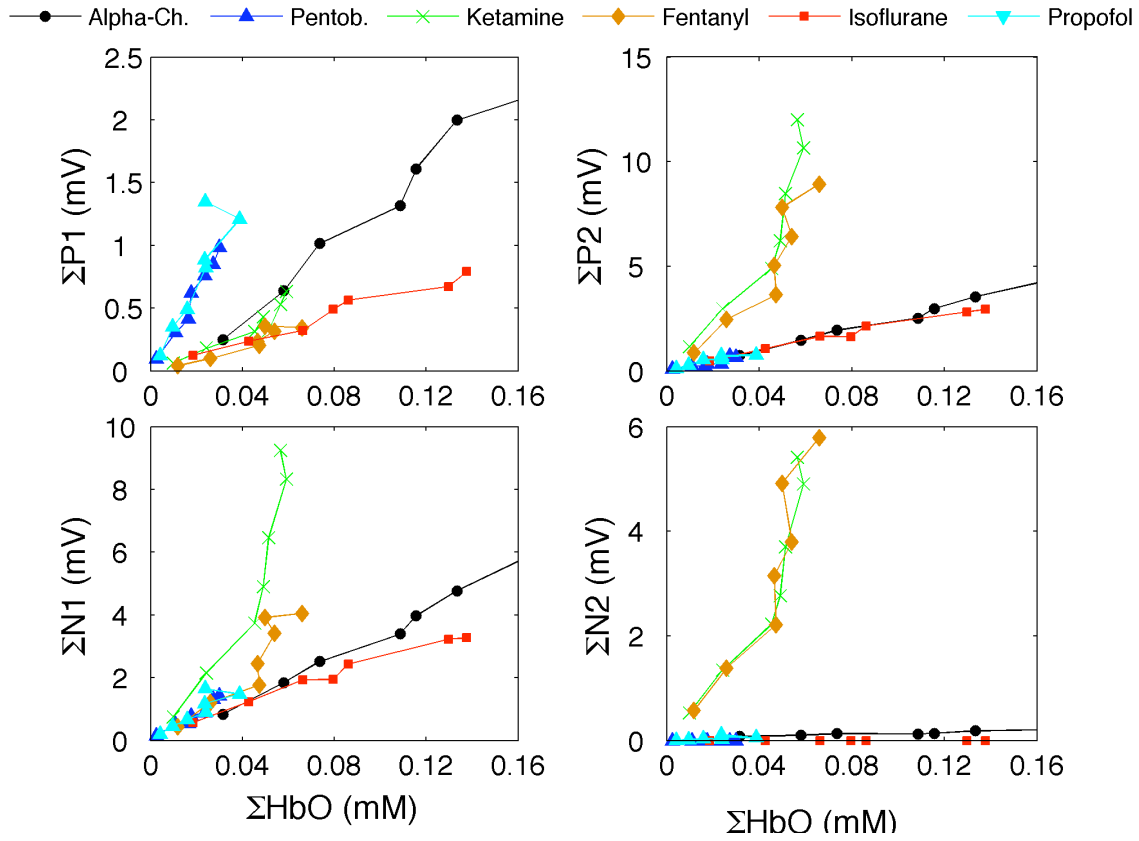

Fig. 3 Online Supplemental Material. Scatter plot of  $\Sigma\text{HbO}$  vs.  $\Sigma\text{SEP}$  components for the 7 conditions (different points) and 6 anesthetics (different curves).

—●— Alph. —▲— Pent. —×— Ket. —◆— Fent. —■— Isofl. —▼— Prop.

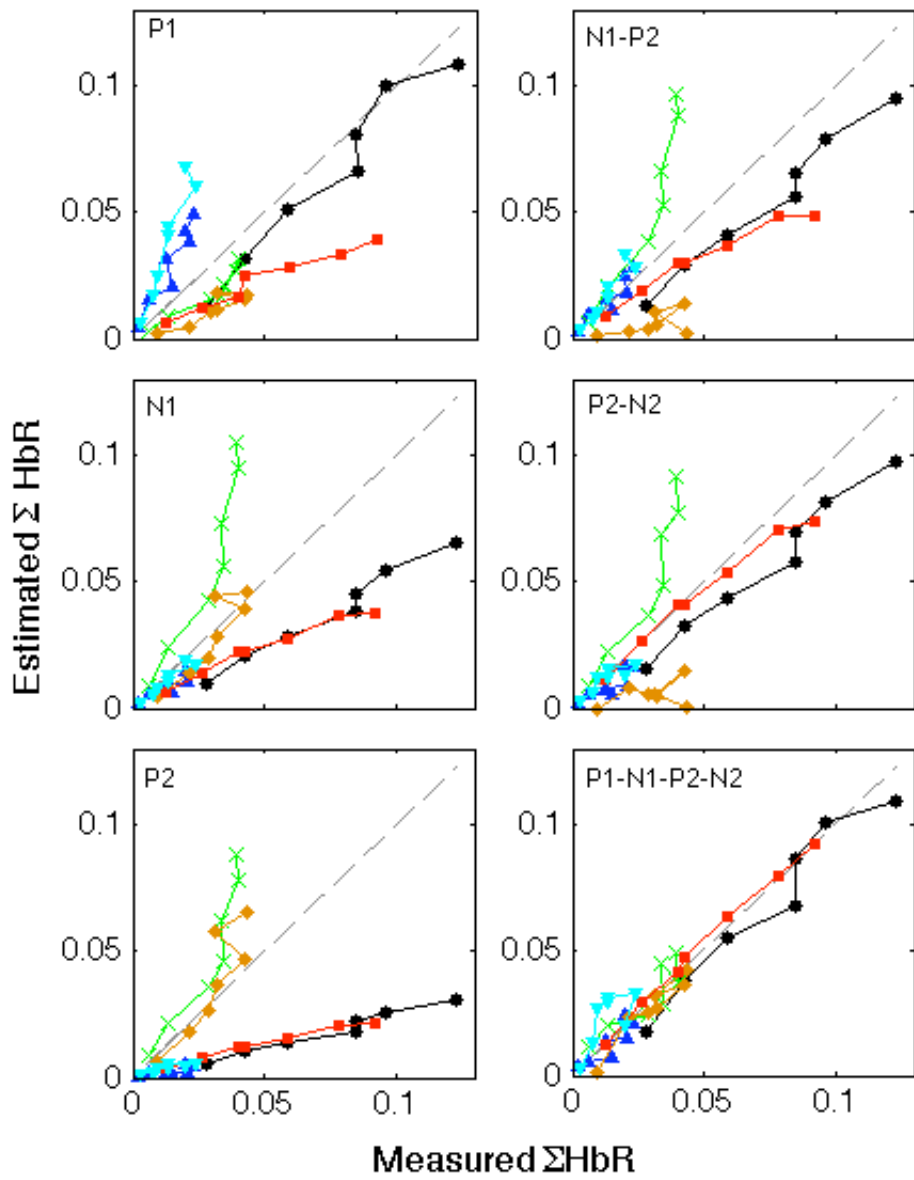

Fig. 4a Supplemental Online Material. Measured and predicted  $\Sigma HbR$  using as regressors different SEP components without baseline blood flow.

—●— Alph. —▲— Pent. —×— Ket. —◆— Fent. —■— Isofl. —▼— Prop.

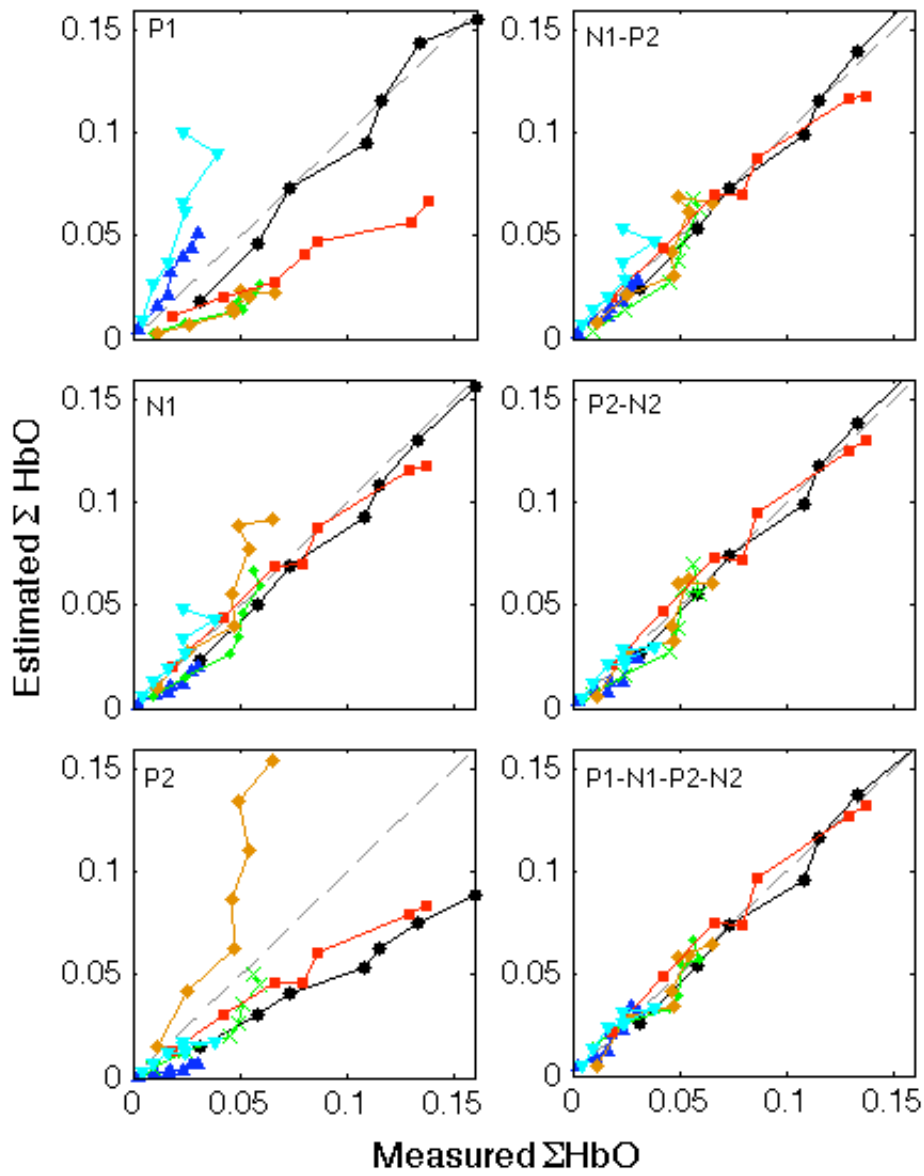

Fig. 4b Supplemental Online Material. Measured and predicted  $\Sigma\text{HbO}$  using as regressors different SEP components and baseline blood flow interaction and fitting for all anesthetic simultaneously.
